# Supplementary material for: Green acetyl modification of puerarin to form puerarin 6′′-O-acetate using engineered Escherichia coli with favorable pathways and elevated acetyl-CoA supply
Source: Royal Society of Chemistry journal article supplement (doi:10.1039/d3gc04474b), 2024-01-01
Supplement: d3gc04474b1.pdf [file d3gc04474b1.pdf]

Green acetyl modification of puerarin to form puerarin 6''-O-  
acetate using engineered *Escherichia coli* with favorable  
pathways and elevated acetyl-CoA supply

Xue-Ning Wang, Li Sheng, Xin-Yi Guo, Hua Sun, Jian-Qiang Kong\*

Institute of Materia Medica, Chinese Academy of Medical Sciences & Peking Union  
Medical College (State Key Laboratory of Bioactive Substance and Function of  
Natural Medicines, NHC Key Laboratory of Biosynthesis of Natural Products &  
CAMS Key Laboratory of Enzyme and Biocatalysis of Natural Drugs), Beijing,  
100050, China

\*, Author to whom correspondence should be addressed.

E-mail: [jianqiangk@imm.ac.cn](mailto:jianqiangk@imm.ac.cn)

## Figure legends

Figure S1 The conversion of P6''A from puerarin through the biological and chemical processes.

Figure S2 The PCR product of *E.coli* genes. 1: *acs*; 2: *pank*; 3: *aceE*; 4: *aceF*; 5: *lpdA*; M: DNA markers indicated with bp.

Figure S3 The co-expression analysis of *acs* and *pank* genes. 1-4, the induced expression of pACYCDuet-*acs-pank*, pCDFDuet-*acs-pank*, pETDuet-*acs-pank* and pRSFDuet-*acs-pank*, respectively; CK, the uninduced strains; M: protein markers indicated as kDa; Red arrows indicated the target proteins.

Figure S4 The co-expression analysis of *aceE*, *aceF* and *lpdA* genes. 1-4, the induced expression of pACYCDuet-*pdh*, pCDFDuet-*pdh*, pETDuet-*pdh* and pRSFDuet-*pdh*, respectively; CK: the uninduced strains; M: protein mass standards indicated with kDa. Red arrows indicated the target proteins.

Figure S5 The co-expression analysis of *acs*, *pank*, *aceE*, *aceF* and *lpdA* genes. 1-2, the induced expression of pACYCDuet-*pdh-pank-acs* and pCDFDuet-*pdh-pank-acs*, respectively; CK, the uninduced strains; M, protein mass standards indicated with kDa; Red arrows showed the expressed proteins.

Figure S6 MAT-catalyzed acetylation of puerarin in the engineered strains.

Figure S7 The condition optimizations to improve P6''A yield in the engineered cells. A, the effect of casamino acid on P6''A production; B, the effect of concentrations of puerarin (Pur) and glucose (Glc) on P6''A production; C, the effect of IPTG concentration on P6''A production.

Figure S8 Acetyltransferase-catalyzed acetylation of puerarin. A, HPLC profiles of acetylated metabolites. a, acetylation assay without acetyltransferases; b, GAT-catalyzed acetylation; c, MAT-catalyzed acetylation; d, the co-elution of the reaction

mixture and the authentic P6''A standard; e, P6''A standard; B, the MS spectrum of the metabolite 2. **1** and **2** represented puerarin and P6''A, respectively.

Figure S9 The effect of pH (A) and temperature (B) on the acetylation activity of GAT. Values are means  $\pm$  SD, n = 3.

Figure S10 Kinetic parameters of GAT for acetyl-CoA (A) or puerarin (B). Values are means  $\pm$  SD, n = 3.

Figure S11 The whole-cell-catalyzed acetylation of puerarin to form P6''A.

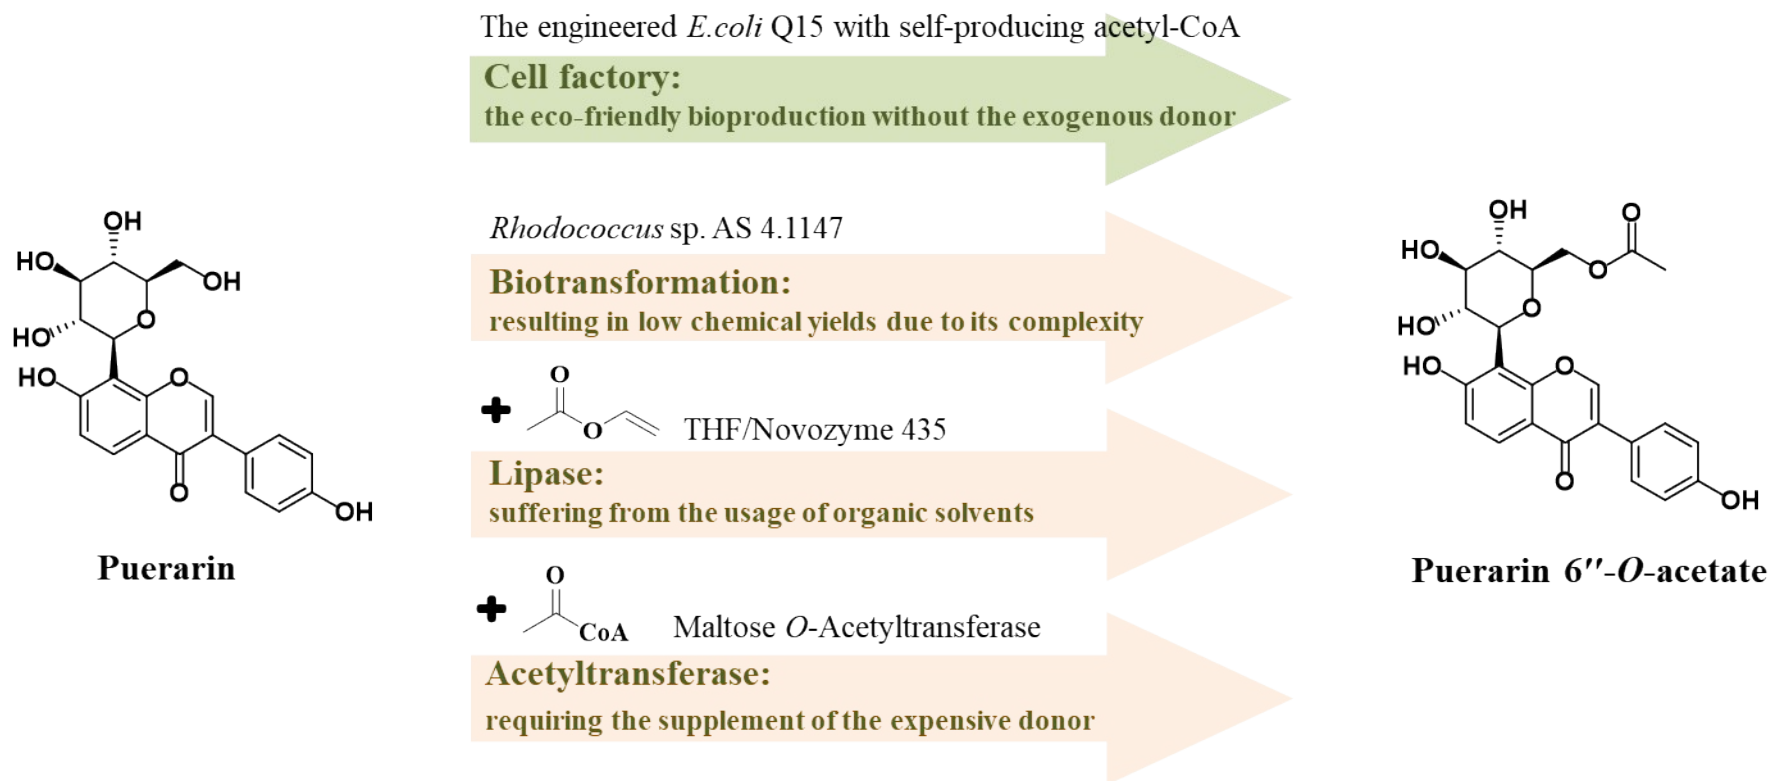

Figure S1 The conversion of P6''A from puerarin through the biological and chemical processes.

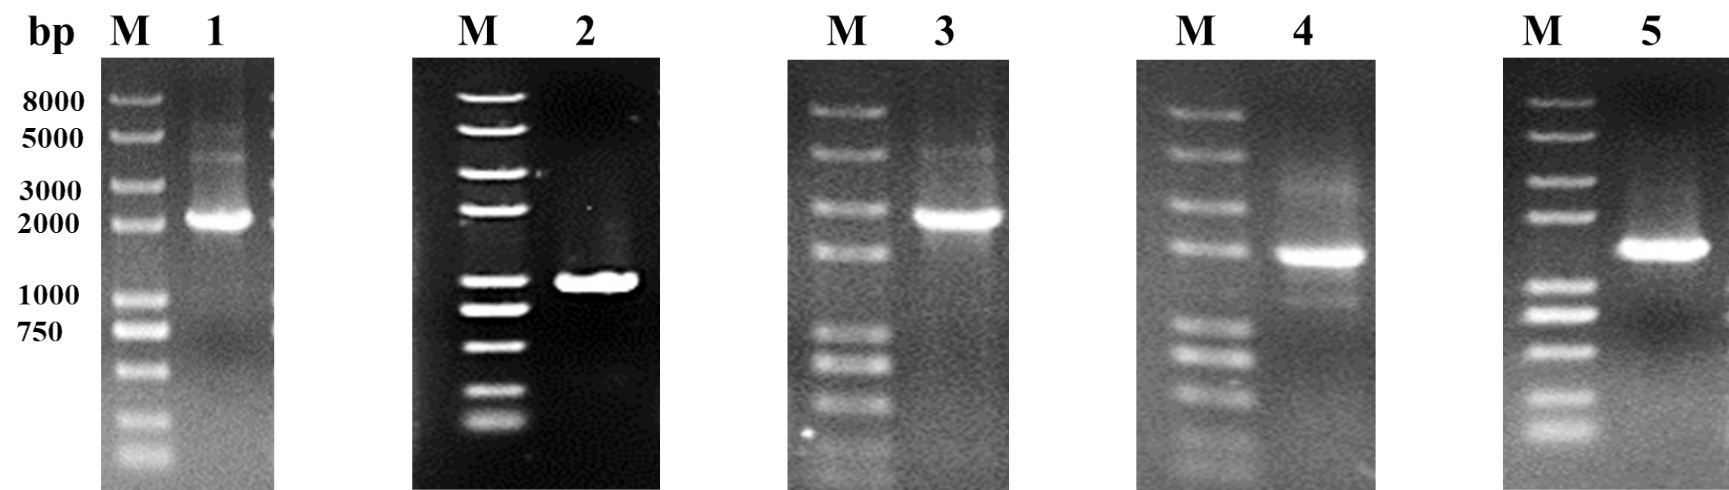

Figure S2 The PCR product of *E.coli* genes.

1:*acs*; 2:*pank*; 3:*aceE*; 4:*aceF*;5:*lpdA*; M: DNA markers indicated with bp.

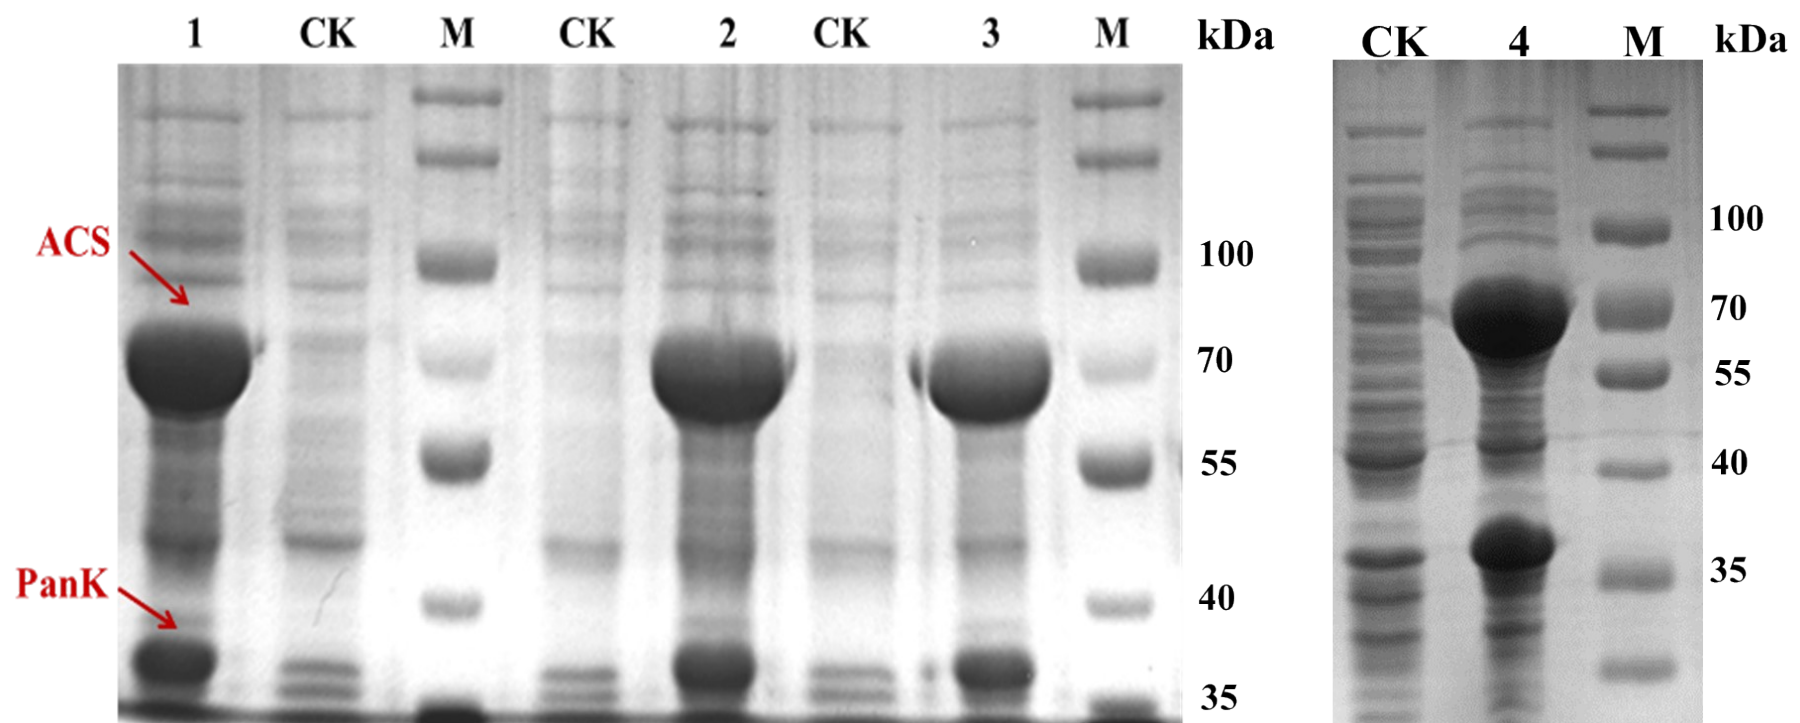

Figure S3 The co-expression analysis of *acs* and *pank* genes. 1-4, the induced expression of pACYCDuet-acs-pank, pCDFDuet-acs-pank, pETDuet-acs-pank and pRSFDuet-acs-pank, respectively; CK, the uninduced strains; M: protein markers indicated as kDa; Red arrows indicated the target proteins.

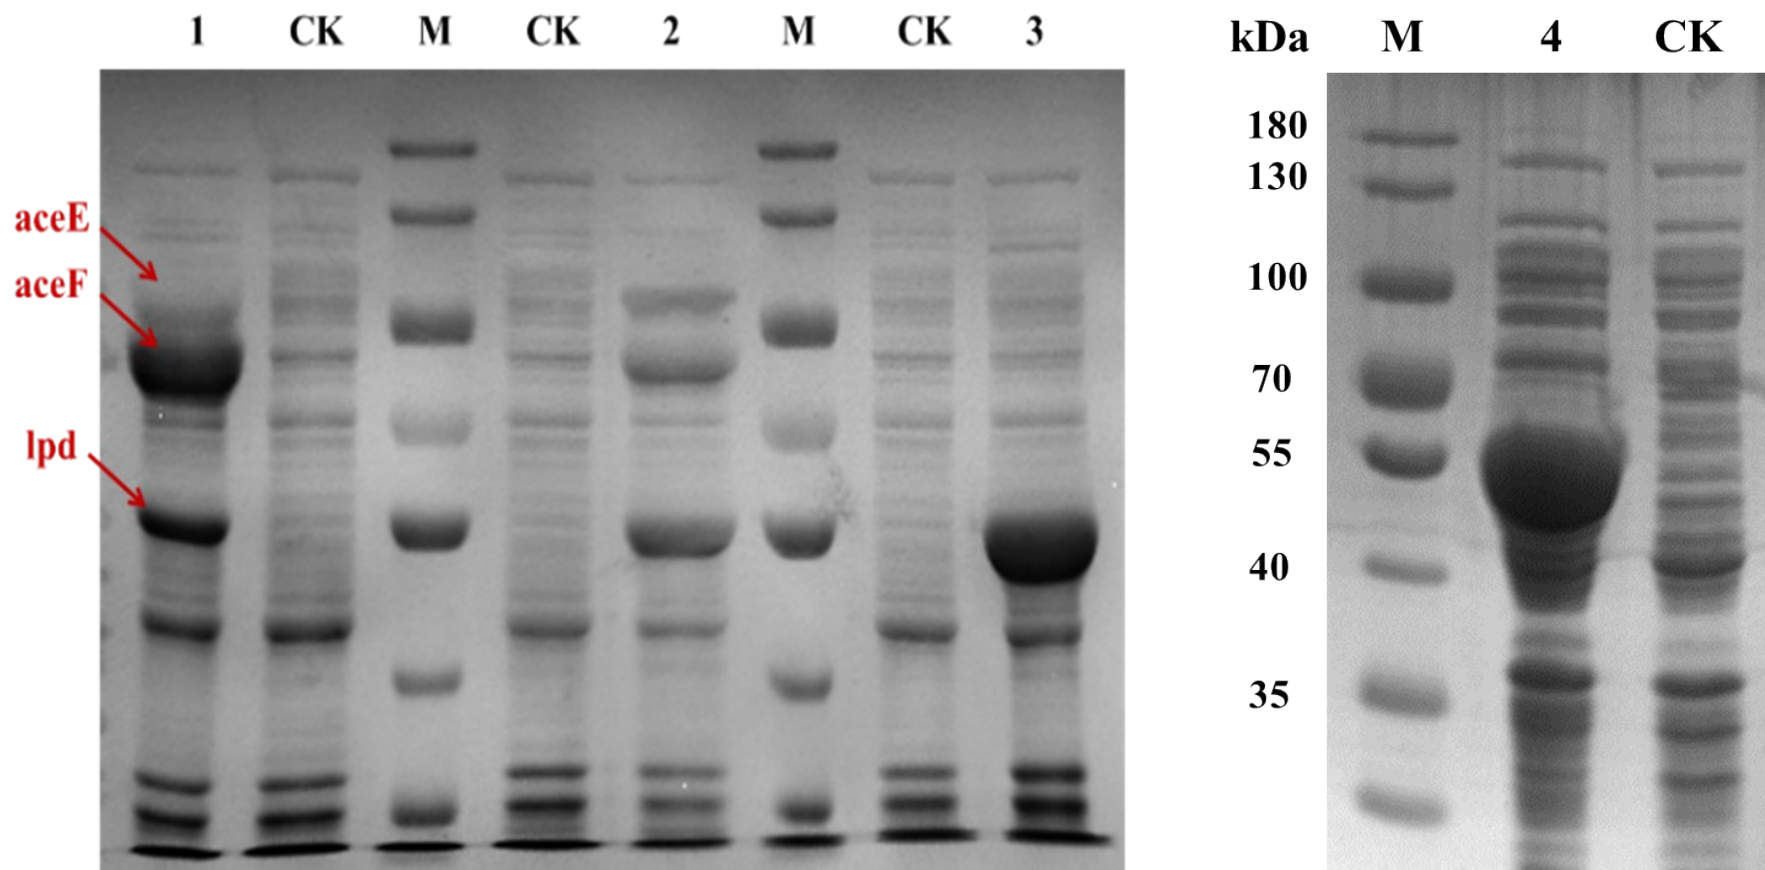

Figure S4 The co-expression analysis of *aceE*, *aceF* and *lpdA* genes.1-4, the induced expression of pACYCDuet-pdh, pCDFDuet-pdh, pETDuet-pdh and pRSFDuet-pdh, respectively; CK: the uninduced strains; M: protein mass standards indicated with kDa. Red arrows indicated the target proteins.

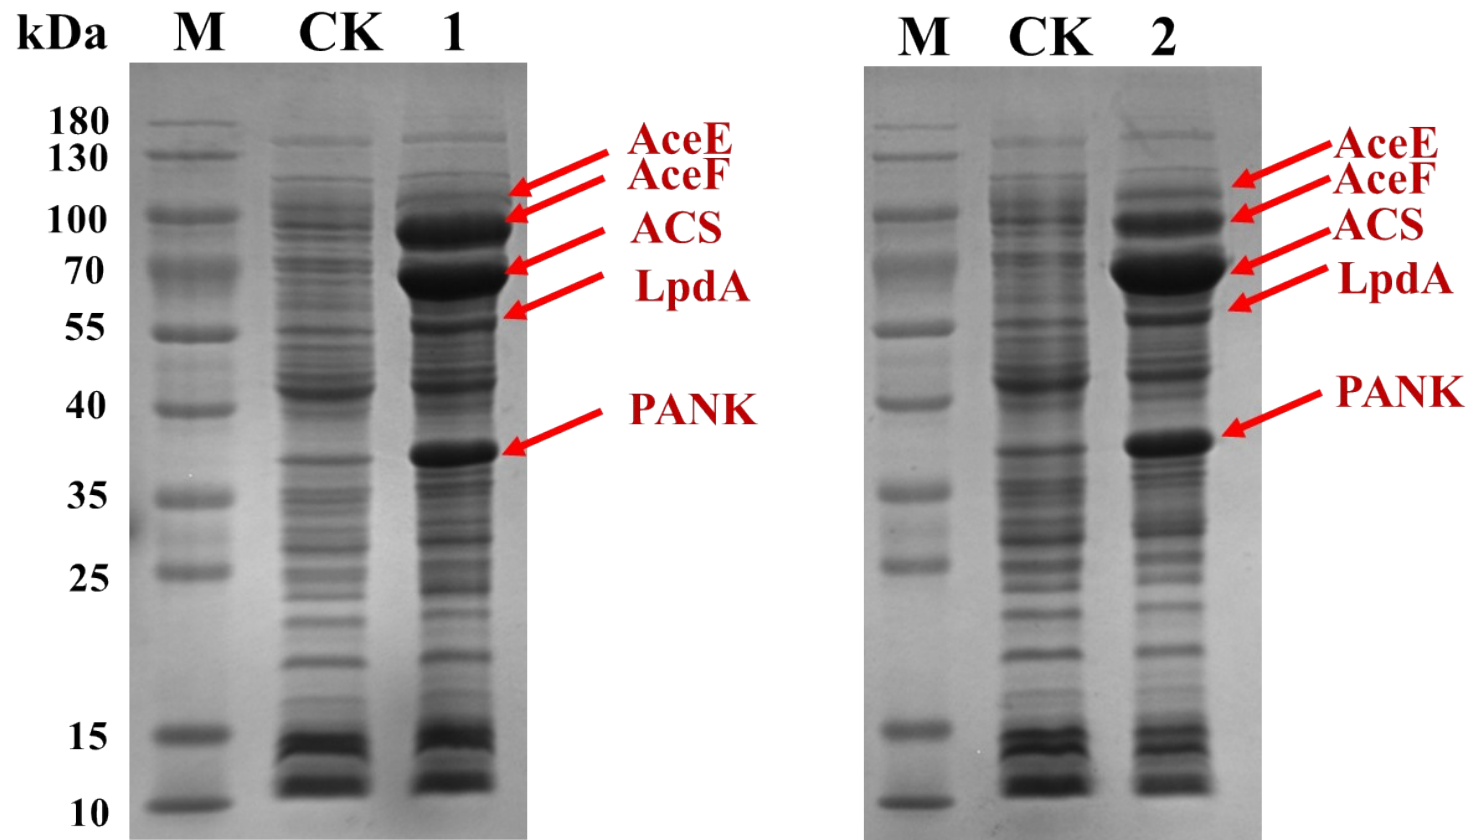

Figure S5 The co-expression analysis of *acs*, *pank*, *aceE*, *aceF* and *lpdA* genes. 1-2, the induced expression of pACYCDuet-pdh-pank-acs and pCDFDuet-pdh-pank-acs, respectively; CK, the uninduced strains; M, protein mass standards indicated with kDa; Red arrows showed the expressed proteins.



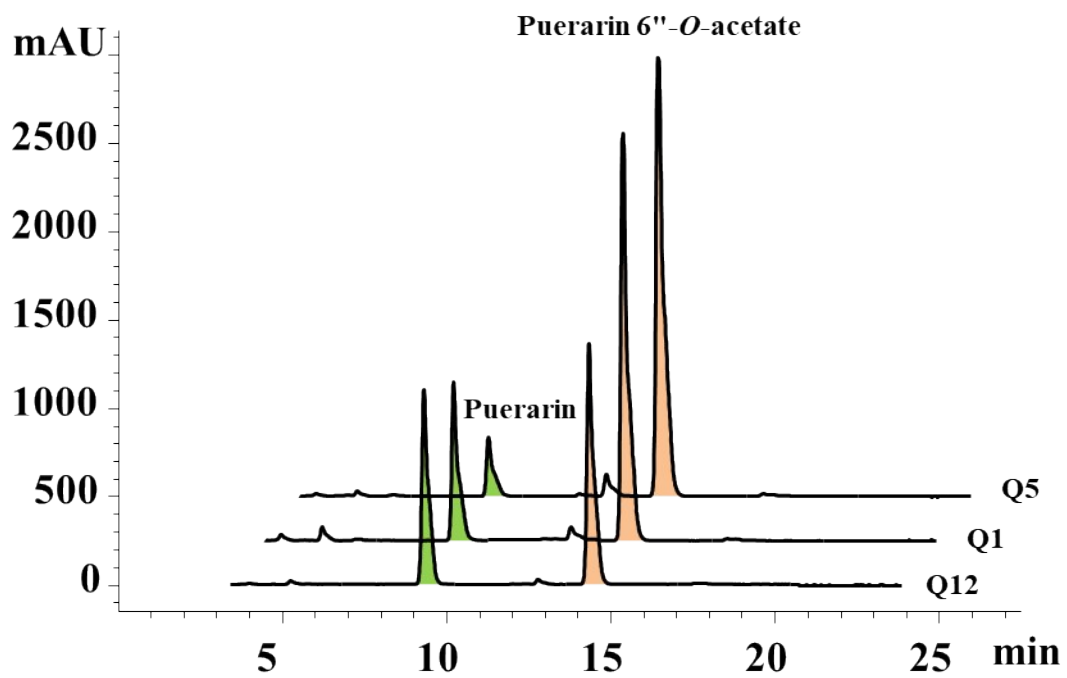

Figure S6 MAT-catalyzed acetylation of puerarin in the engineered strains.

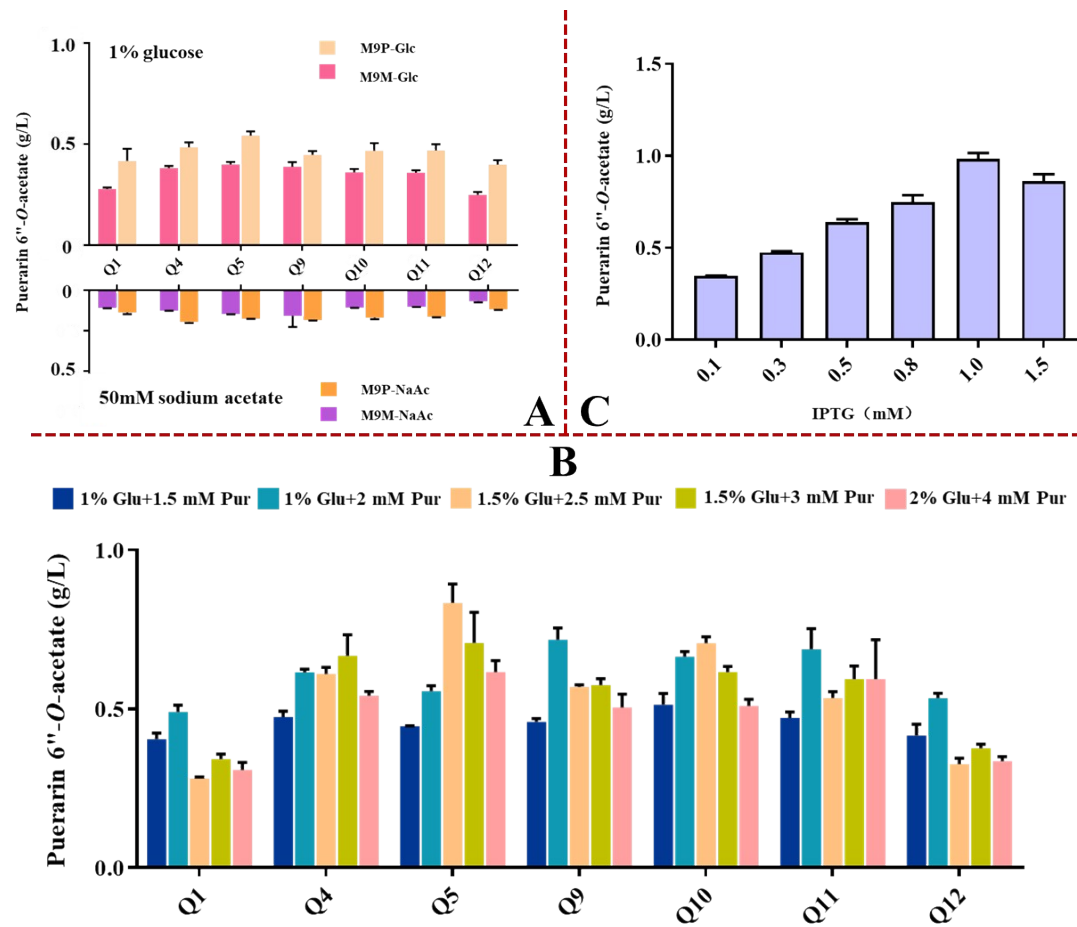

Figure S7 The condition optimizations to improve P6''A yield in the engineered cells. A, the effect of casamino acid on P6''A production; B, the effect of concentrations of puerarin (Pur) and glucose (Glc) on P6''A production; C, the effect of IPTG concentration on P6''A production.

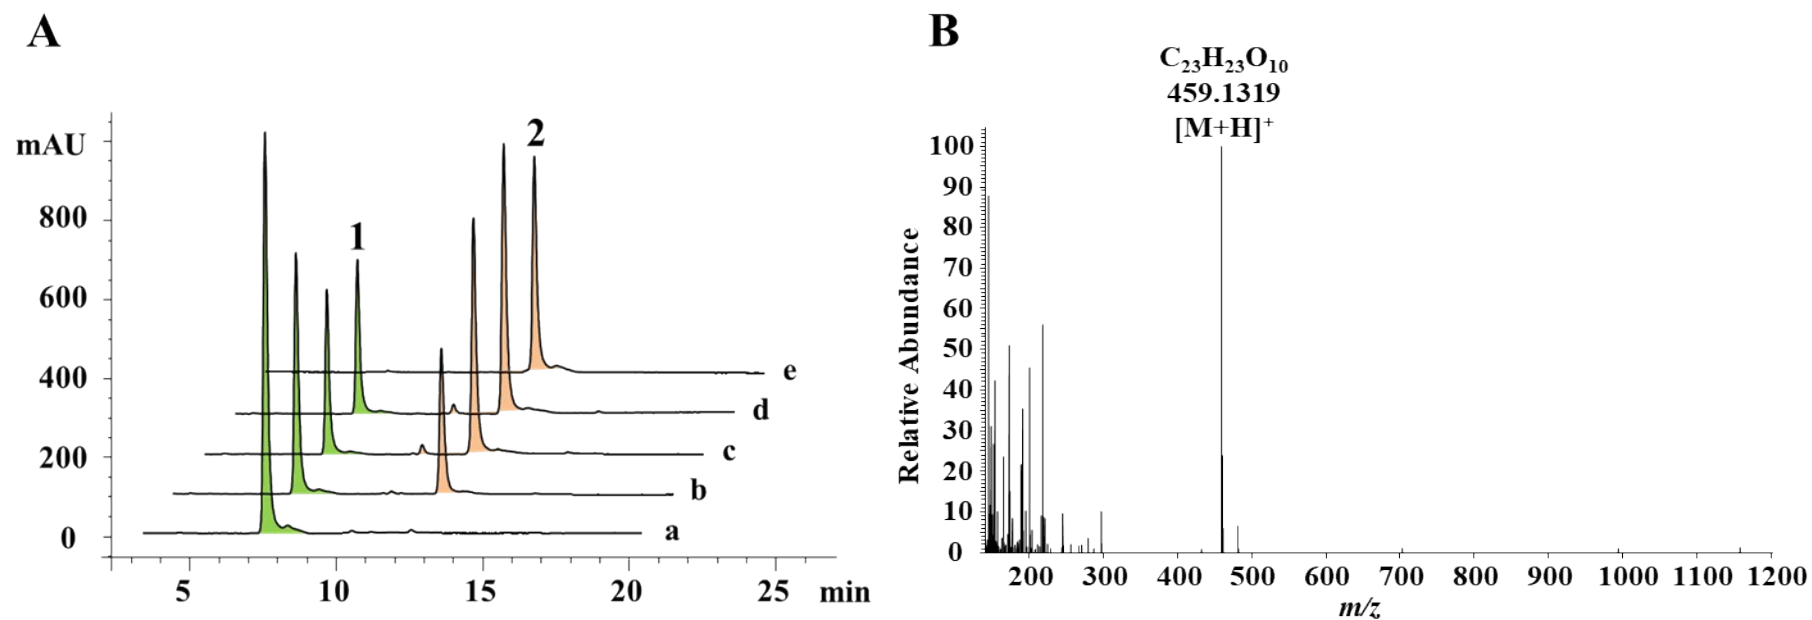

Figure S8 Acetyltransferase-catalyzed acetylation of puerarin. A, HPLC profiles of acetylated metabolites. a, acetylation assay without acetyltransferases; b, GAT-catalyzed acetylation; c, MAT-catalyzed acetylation; d, the co-elution of the reaction mixture and the authentic P6''A standard; e, P6''A standard; B, the MS spectrum of the metabolite 2. **1** and **2** represented puerarin and P6''A, respectively.

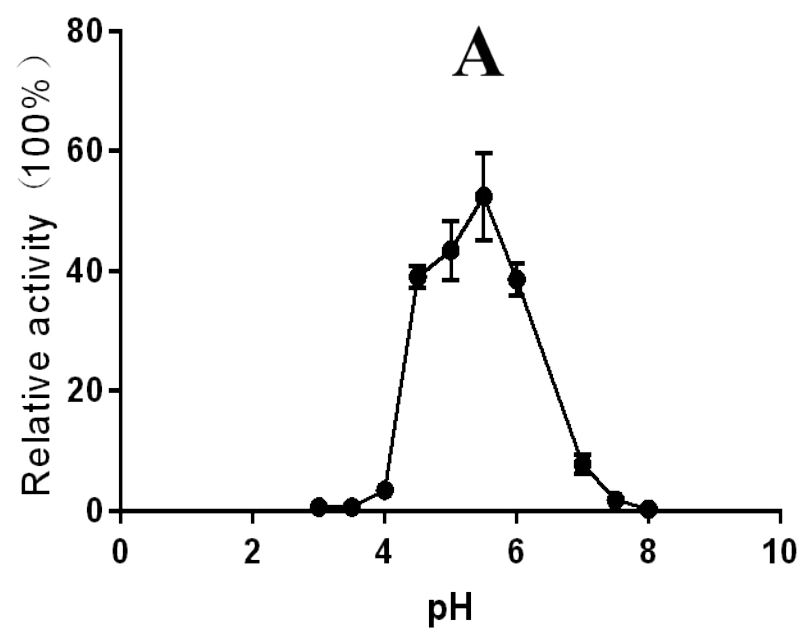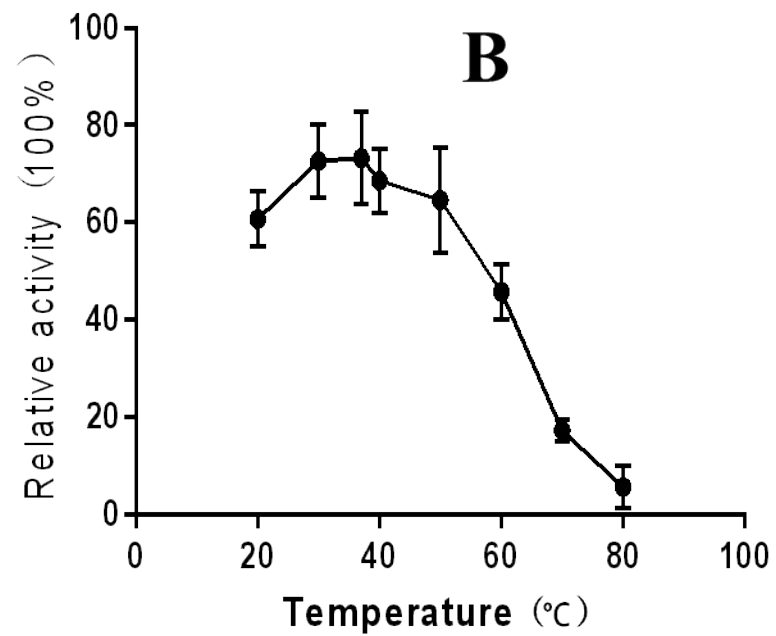

Figure S9 The effect of pH (A) and temperature (B) on the acetylation activity of GAT. Values are means  $\pm$  SD, n = 3.

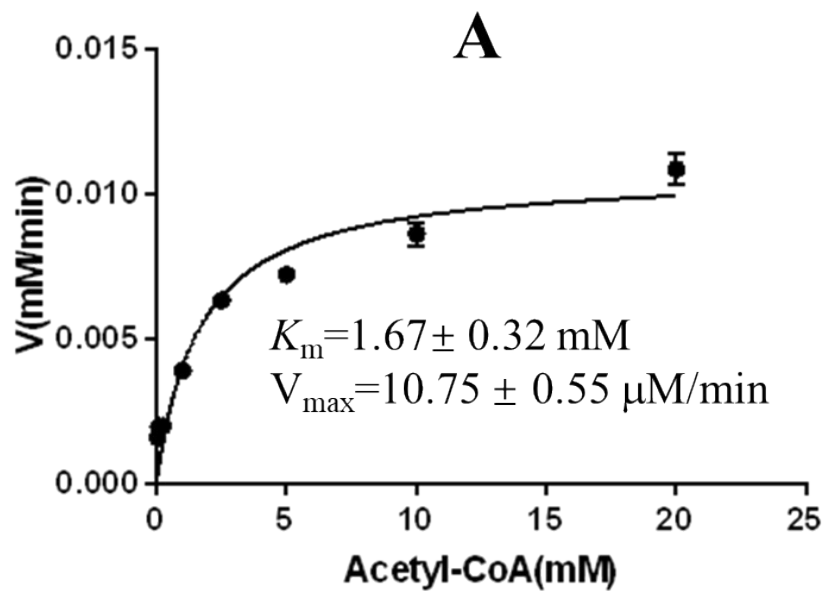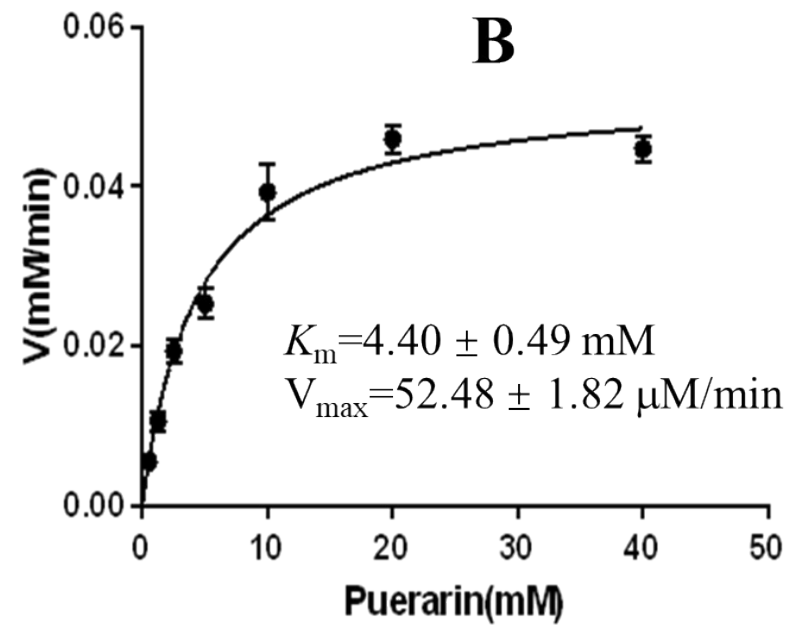

Figure S10 Kinetic parameters of GAT for acetyl-CoA (A) or puerarin (B). Values are means  $\pm$  SD, n = 3.

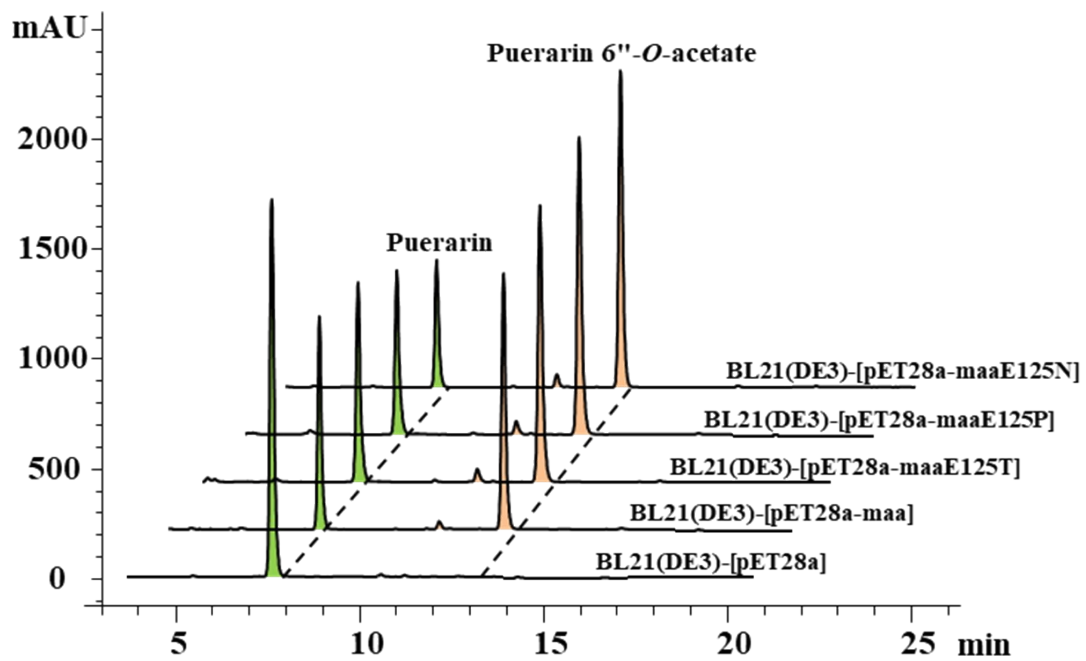

Figure S11 The whole-cell-catalyzed acetylation of puerarin to form P6''A.

## **Table caption**

Table S1 Strains used in this study

Table S2 Plasmids used in this study

Table S3 Genes used in this study

Table S4 Primers used in this study

Table S1 Strains used in this study

| Strain           | Genotype                                                                                                            | Source     |
|------------------|---------------------------------------------------------------------------------------------------------------------|------------|
| <i>Trans1-T1</i> | F- $\phi$ 80(lacZ) $\Delta$ M15 $\Delta$ lacX74hsdR(rk <sup>-</sup> , mk <sup>+</sup> ) $\Delta$ recA1398 endA1tonA | Transgen   |
| BL21(DE3)        | F <sup>-</sup> <i>ompT hsdS</i> (r <sub>B</sub> <sup>-</sup> m <sub>B</sub> <sup>-</sup> ) <i>gal dcm</i> (DE3)     | Transgen   |
| BL21(DE3)-CoA    | BL21(DE3)[pRSFDuet-acs + pCDFDuet-pdh]                                                                              | This study |
| Q1               | BL21(DE3)[pETDuet- <i>maa</i> ]                                                                                     | This study |
| Q2               | BL21(DE3)[pETDuet- <i>maa</i> +pRSFDuet-acs]                                                                        | This study |
| Q3               | BL21(DE3)[pETDuet- <i>maa</i> +pRSFDuet-acs- <i>pank</i> ]                                                          | This study |
| Q4               | BL21(DE3)[pETDuet- <i>maa</i> +pCDFDuet-pdh]                                                                        | This study |
| Q5               | BL21(DE3)[pETDuet- <i>maa</i> +pRSFDuet-acs+pCDFDuet-pdh]                                                           | This study |
| Q6               | BL21(DE3)[pETDuet- <i>maa</i> +pRSFDuet-acs- <i>pank</i> +pCDFDuet-pdh]                                             | This study |
| Q7               | BL21(DE3)[pRSFDuet- <i>maa</i> +pACYCDuet-acs]                                                                      | This study |
| Q8               | BL21(DE3)[pRSFDuet- <i>maa</i> +pACYCDuet-acs- <i>pank</i> ]                                                        | This study |
| Q9               | BL21(DE3)[pRSFDuet- <i>maa</i> +pCDFDuet-pdh]                                                                       | This study |
| Q10              | BL21(DE3)[pRSFDuet- <i>maa</i> +pACYCDuet-acs+pCDFDuet-pdh]                                                         | This study |
| Q11              | BL21(DE3)[pRSFDuet- <i>maa</i> +pACYCDuet-acs- <i>pank</i> +pCDFDuet-pdh]                                           | This study |
| Q12              | BL21(DE3)[pRSFDuet- <i>maa</i> ]                                                                                    | This study |
| Q13              | BL21(DE3)[pRSFDuet- <i>maa</i> +pACYCDuet-pdh- <i>pank</i> -acs]                                                    | This study |
| Q14              | BL21(DE3) [pRSFDuet- <i>maa</i> +pCDFDuet-pdh- <i>pank</i> -acs]                                                    | This study |
| Q15              | BL21(DE3)[pETDuet- <i>maa</i> E125N+pRSFDuet-acs+pCDFDuet-pdh]                                                      | This study |



Table S2 Plasmids used in this study

| Plasmids                                                                                                   | Relevant properties or genetic marker                                                                               | Source     |
|------------------------------------------------------------------------------------------------------------|---------------------------------------------------------------------------------------------------------------------|------------|
| pEASY-Blunt                                                                                                | A cloning vector                                                                                                    | TransGen   |
| pET-28a(+)                                                                                                 | An expression plasmid developed for the protein expression in <i>E. coli</i>                                        | Novagen    |
| pACYCDuet <sup>TM</sup> -1; pCDFDuet <sup>TM</sup> -1; pETDuet <sup>TM</sup> -1; pRSFDuet <sup>TM</sup> -1 | Duet plasmids, containing two multiple cloning sites (MCS), are designed for the co-expression of two target genes. | Novagen    |
| pEASY-aceF; pEASY-aceE; pEASY-lpd; pEASY-pank; pEASY-acs                                                   | pEASY-Blunt derived plasmids, each containing an <i>E. coli</i> gene                                                | This study |
| pET28a-lpd                                                                                                 | A pET-28a(+) derived plasmid containing <i>lpd</i> gene                                                             | This study |
| pACYCDuet-acs; pCDFDuet-acs; pETDuet-acs; pRSFDuet-acs                                                     | Duet-derived plasmids containing <i>acs</i> gene                                                                    | This study |
| pACYCDuet-acs-pank; pCDFDuet-acs-pank; pETDuet-acs-pank; pRSFDuet-acs-pank                                 | Duet-derived plasmids, each containing both <i>acs</i> and <i>pank</i> genes                                        | This study |
| pACYCDuet-aceF; pCDFDuet-aceF; pETDuet-aceF; pRSFDuet-aceF                                                 | Duet-derived plasmids containing <i>aceF</i> gene                                                                   | This study |
| pACYCDuet-aceE/F; pCDFDuet- aceE/F; pETDuet- aceE/F; pRSFDuet- aceE/F                                      | Duet-derived plasmids, each containing both <i>aceE</i> and <i>aceF</i> genes                                       | This study |
| pACYCDuet-pdh; pCDFDuet-pdh; pETDuet-pdh; pRSFDuet-pdh                                                     | Duet-derived plasmids, each containing <i>aceE</i> , <i>aceF</i> and <i>lpd</i> genes                               | This study |
| pACYCDuet-pdh-pank-acs and pCDFDuet-pdh-pank-acs                                                           | Duet-derived plasmids containing pdh, pank and acs genes                                                            | This study |
| pET28a-lacA                                                                                                | A pET-28a(+) derived plasmid containing <i>lacA</i> gene                                                            | 1          |
| pET28a-maa                                                                                                 | A pET-28a(+) derived plasmid containing <i>maa</i> gene                                                             | 1,2        |
| pACYCDuet-maa, pCDFDuet-maa, pETDuet-maa and pRSFDuet-maa                                                  | Duet-derived plasmids containing <i>maa</i> gene                                                                    |            |
| pET28a-maaE125N                                                                                            | A pET-28a(+) derived plasmid containing <i>maaE125N</i> gene                                                        | 2          |
| pET28a-maaE125T                                                                                            | A pET-28a(+) derived plasmid containing <i>maaE125T</i> gene                                                        | 2          |
| pET28a-maaE125P                                                                                            | A pET-28a(+) derived plasmid containing <i>maaE125P</i> gene                                                        | 2          |

Table S3 Genes used in this study

| Protein                                  | CDS (aa) | gene        | ORF (bp) | GenBank     |
|------------------------------------------|----------|-------------|----------|-------------|
| ACS (acetyl-CoA synthetase)              | 652      | <i>acs</i>  | 1959     | NP_418493.1 |
| PanK (type I pantothenate kinase)        | 316      | <i>panK</i> | 951      | QNG34802.1  |
| AceE (pyruvate dehydrogenase subunit E1) | 887      | <i>aceE</i> | 2664     | QNG31207.1  |
| AceF (pyruvate dehydrogenase subunit E2) | 630      | <i>aceF</i> | 1893     | QNG31208.1  |
| Lpd (dihydrolipoyl dehydrogenase)        | 474      | <i>lpdA</i> | 1425     | QNG31209.1  |

Table S4 Primers used in this study

| Primer                | Sequence (5'-3')                                     | Description                                                                     |
|-----------------------|------------------------------------------------------|---------------------------------------------------------------------------------|
| <i>acs</i> -TF        | ATGAGCCAAATTCACAAACACACC                             | A forward primer used for <i>acs</i> gene isolation                             |
| <i>acs</i> -TR        | TTACGATGGCATCGGATAGCCTG                              | A forward primer used for <i>acs</i> gene isolation                             |
| <i>aceE</i> -TF       | ATGTCAGAACGTTTCCCAAATGACGTGG                         | A forward primer used for <i>aceE</i> gene isolation                            |
| <i>aceE</i> -TR       | TTACGCCAGACGCGGGTAACTTTATCT                          | A reverse primer used for <i>aceE</i> gene isolation                            |
| <i>aceF</i> -TF       | ATGGCTATCGAAATCAAAGTACCGGACATCGGG                    | A forward primer used for <i>aceF</i> gene isolation                            |
| <i>aceF</i> -TR       | TTACATCACCAGACGGCGAATGTCA                            | A reverse primer used for <i>aceF</i> gene isolation                            |
| <i>lpd</i> -TF        | ATGAGTACTGAAATCAAAACTCAGGTCGTGG                      | A forward primer used for <i>lpdA</i> gene isolation                            |
| <i>lpd</i> -TR        | ATGAGTACTGAAATCAAAACTCAGGTCGTGG                      | A reverse primer used for <i>lpdA</i> gene isolation                            |
| <i>pank</i> -TF       | ATGAGTATAAAAGAGCAAACGTTAATGACGCC                     | A forward primer used for <i>pank</i> gene isolation                            |
| <i>pank</i> -TR       | TTATTTGCGTAGTCTGACCTCTTCTACCGC                       | A reverse primer used for <i>pank</i> gene isolation                            |
| Duet-MAT-F            | CACCACAGCCAGGATCCGAATTCGATGAGCACAGAAAAA              | A forward primer to construct Duet-derived plasmids containing <i>maa</i> gene  |
| Duet-MAT-R            | TAAGCATTATGCGGCCGAAGCTTTTACAATTTTTTAAT               | A reverse primer to construct Duet-derived plasmids containing <i>maa</i> gene  |
| <i>acs</i> -DuetF     | GTATAAGAAGGAGATATACATATGATGAGCCAAATTCACAAACAC        | A forward primer to construct Duet-derived plasmids containing <i>acs</i> gene  |
| <i>acs</i> -DuetR     | GCCGATATCCAATTGAGATCTTACGATGGCATC                    | A reverse primer to construct Duet-derived plasmids containing <i>acs</i> gene  |
| <i>pank</i> -DuetF    | CCATCATCACCACAGCCAGGATCCGATGAGTATAAAAAGAGCAA         | A forward primer to construct Duet-derived plasmids containing <i>pank</i> gene |
| <i>pank</i> -DuetR    | CAGGCGCGCCGAGCTCGAATTCTTATTTGCGTAGTCT                | A reverse primer to construct Duet-derived plasmids containing <i>pank</i> gene |
| <i>lpd</i> -28aF      | GCAAATGGGTGCGGGATCCGAATTCATGAGTACTGAAATC             | A forward primer to construct pET28a- <i>lpd</i>                                |
| <i>lpd</i> -28aR      | CTCGAGTGCGGCCGCAAGCTTTACTTCTTCTTCGC                  | A reverse primer to construct pET28a- <i>lpd</i>                                |
| T7+ <i>lpd</i> -DuetF | GCTGACGTCGGTACCCTCGAGAGATCTCGATCCCGC                 | A forward primer to construct Duet-derived plasmids containing <i>lpd</i> gene  |
| T7+ <i>lpd</i> -DuetR | CGGTGGCAGCAGCCTAGGTTAATTAATTACTTCTTCTTCGCTTTCGG<br>G | A reverse primer to construct Duet-derived plasmids containing <i>lpd</i> gene  |
| <i>aceE</i> DuetF     | CATCATCACCACAGCCAGGATCCGATGTCAGAACGTTTCCC            | A forward primer to construct Duet-derived plasmids containing <i>aceE</i> gene |
| <i>aceE</i> DuetR     | AGGCGCGCCGAGCTCGAATTCTTACGCCAGACGCGG                 | A reverse primer to construct Duet-derived plasmids containing <i>aceE</i> gene |

|                               |                                               |                                                                                 |
|-------------------------------|-----------------------------------------------|---------------------------------------------------------------------------------|
| <i>aceF</i> DuetF             | ATAAGAAGGAGATATACATATGATGGCTATCGAAATCAAAGTACC | A forward primer to construct Duet-derived plasmids containing <i>aceF</i> gene |
| <i>aceF</i> DuetR             | GCCGATATCCAATTGAGATCTTTACATCACCAGACG          | A reverse primer to construct Duet-derived plasmids containing <i>aceF</i> gene |
| <i>pdh-acs-pank-</i><br>DuetF | AAAGCGAAGAAGAAGTAATTAATTAAGCCATACCGCGAAAGGTT  | A forward primer to construct pACYCDuet-pdh-pank-acs                            |
| <i>pdh-acs-pank-</i><br>DuetR | TCAGCGGTGGCAGCAGCCTAGGTTACGATGGCATCGC         | A reverse primer to construct pCDFDuet-pdh-pank-acs                             |

## Reference

- 1 M. Liu, and J.-Q.Kong, *Acta Pharm Sin B.* **2018**, 8, 981-994.
- 2 X. N.Wang, L.L.Hong and J.Q.Kong, *J Agric. Food Chem.* **2021**, 69, 6623-6635.
